# Supplementary material for: A Biocompatible Colorimetric Triphenylamine- Dicyanovinyl Conjugated Fluorescent Probe for Selective and Sensitive Detection of Cyanide Ion in Aqueous Media and Living Cells
Source: MDPI journal article supplement (doi:10.3390/s17020405), 2017-02-19
Supplement: s1 [file s1]

# Supplementary Materials: A Biocompatible Colorimetric Triphenylamine-Dicyanovinyl Conjugated Fluorescent Probe for Selective and Sensitive Detection of Cyanide Ion in Aqueous Media and Living Cells

Zi-Hua Zheng, Zhi-Ke Li, Lin-Jiang Song, Qi-Wei Wang, Qing-Fei Huang and Li Yang

## Table of Contents

Figure S1.

Figure S2.

Figure S3.

Figure S4.

Figure S5.  $^1\text{H}$ -NMR Spectrum of **3** in  $\text{CDCl}_3$  (300 MHz).

Figure S6.  $^1\text{H}$ -NMR Spectrum of **4** in  $\text{DMSO}-d_6$  (300 MHz).

Figure S7.  $^{13}\text{C}$ -NMR Spectrum of **4** in  $\text{DMSO}-d_6$  (75 MHz).

Figure S8.  $^1\text{H}$ -NMR Spectrum of **1** in  $\text{CDCl}_3$  (300 MHz).

Figure S9.  $^{13}\text{C}$ -NMR Spectrum of **1** in  $\text{CDCl}_3$  (75 MHz).

Figure S10. HRMS (ESI) Spectrum of **1**.

Figure S11. HRMS (ESI) Spectrum of  $[\mathbf{1} + \text{CN}]^-$

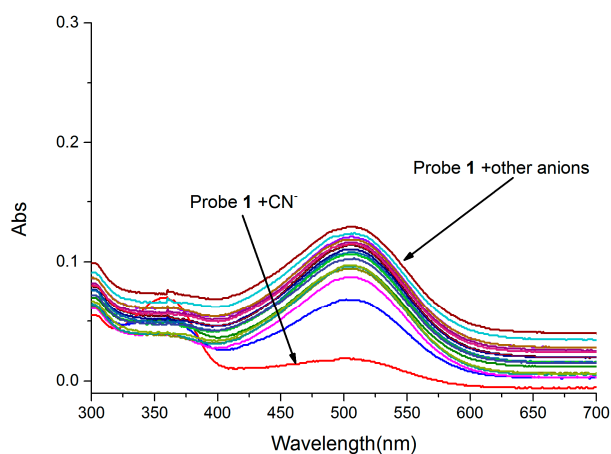

**Figure S1.** Changes in the absorption spectra of **1** (5  $\mu\text{M}$ ) upon addition of various anions (50  $\mu\text{M}$ ) in PBS/DMSO (4/6, pH = 7.4) solution.

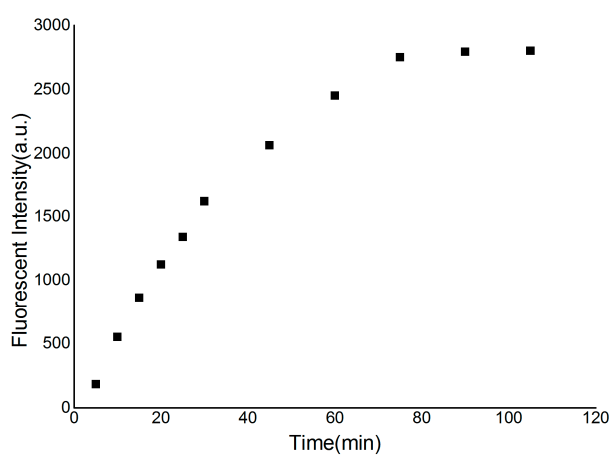

**Figure S2.** Time-dependent change of fluorescent intensity of probe **1** in absence or presence of  $\text{CN}^-$  (50  $\mu\text{M}$ ) in PBS/DSMO (4/6, pH = 7.4) solution.  $\lambda_{\text{ex}}$  = 370 nm, slit: 2.5 nm/5 nm.

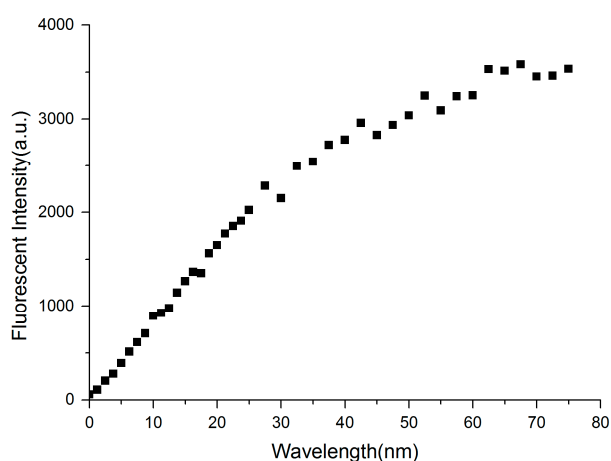

**Figure S3.** Fluorescent intensity of probe **1** (5  $\mu\text{M}$ ) at 480 nm upon addition of different concentration of  $\text{CN}^-$  (0–75  $\mu\text{M}$ ) in PBS/DSMO (4/6, pH = 7.4) solution.  $\lambda_{\text{ex}}$  = 370 nm, Slits: 2.5 nm/5 nm.

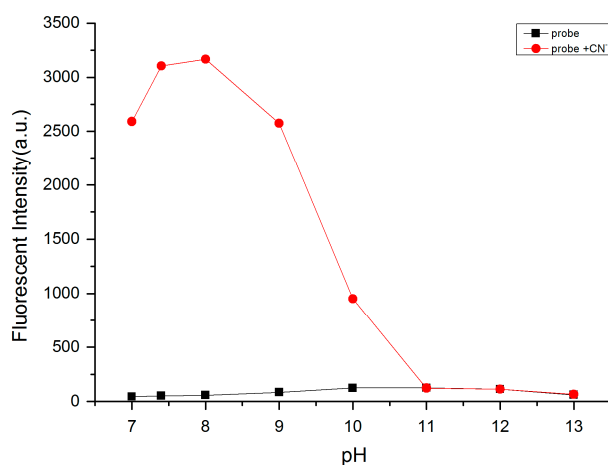

**Figure S4.** The effect of pH on the fluorescent intensity of probe **1** (5  $\mu$ M) in the absence and presence of  $\text{CN}^-$  (50  $\mu$ M) in PBS/DSMO (4/6) solution. Black line, probe; red line, probe +  $\text{CN}^-$ .  $\lambda_{\text{ex}}$  = 370 nm, Slit: 2.5 nm/5 nm.

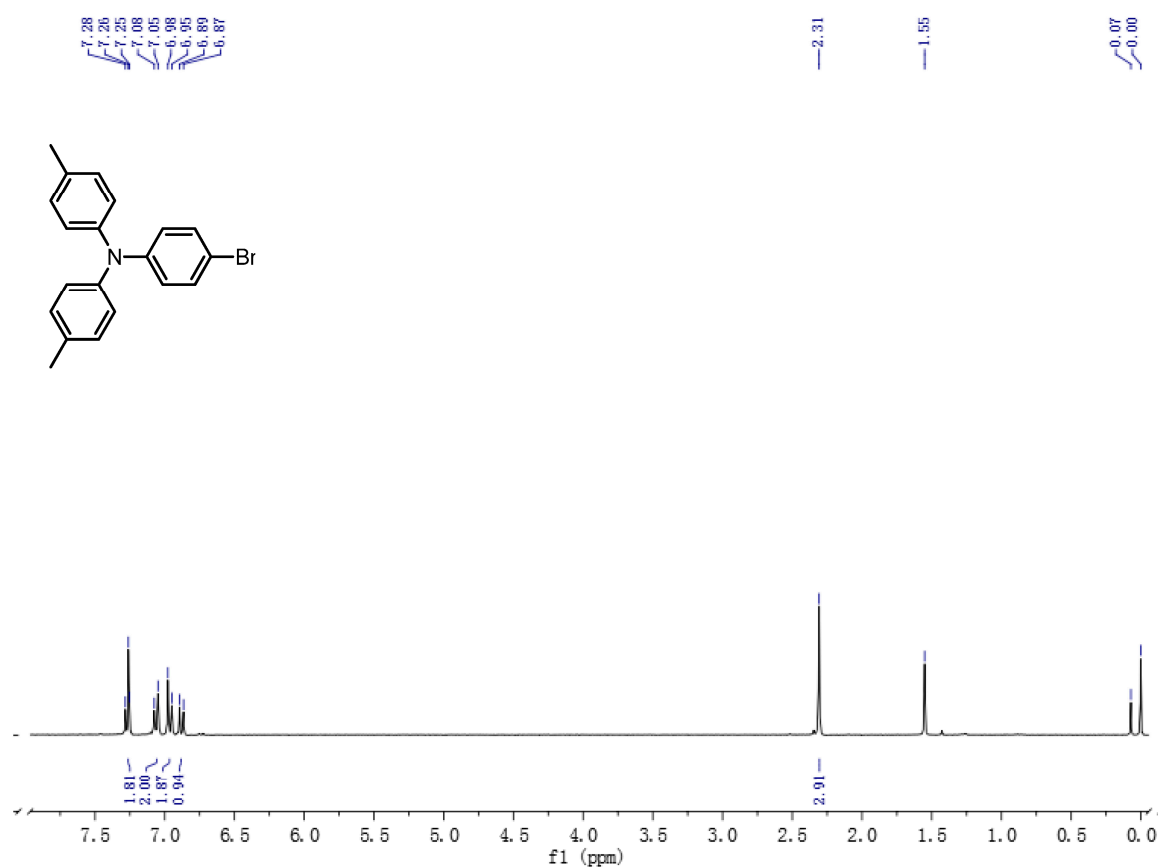

**Figure 5.** <sup>1</sup>H-NMR Spectrum of **3** in CDCl<sub>3</sub> (300 MHz).

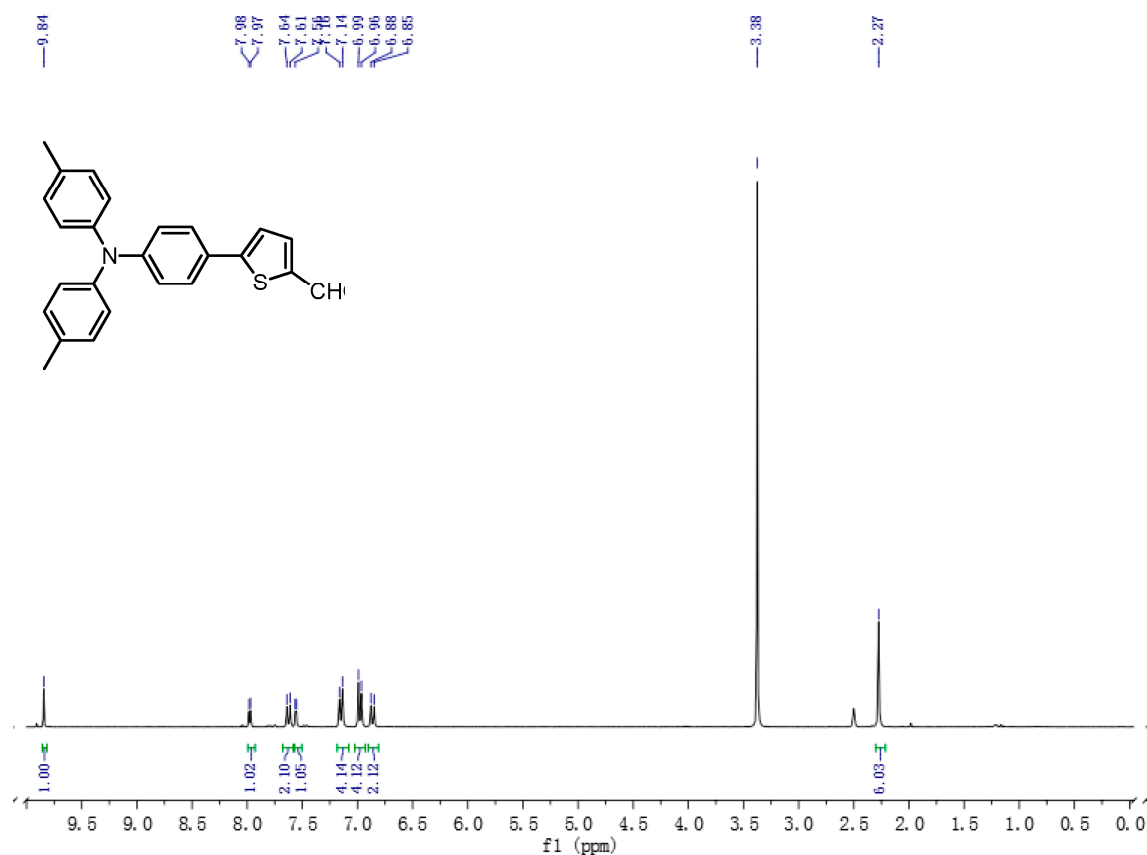

Figure S6. <sup>1</sup>H-NMR Spectrum of 4 in DMSO-d<sub>6</sub> (300 MHz).

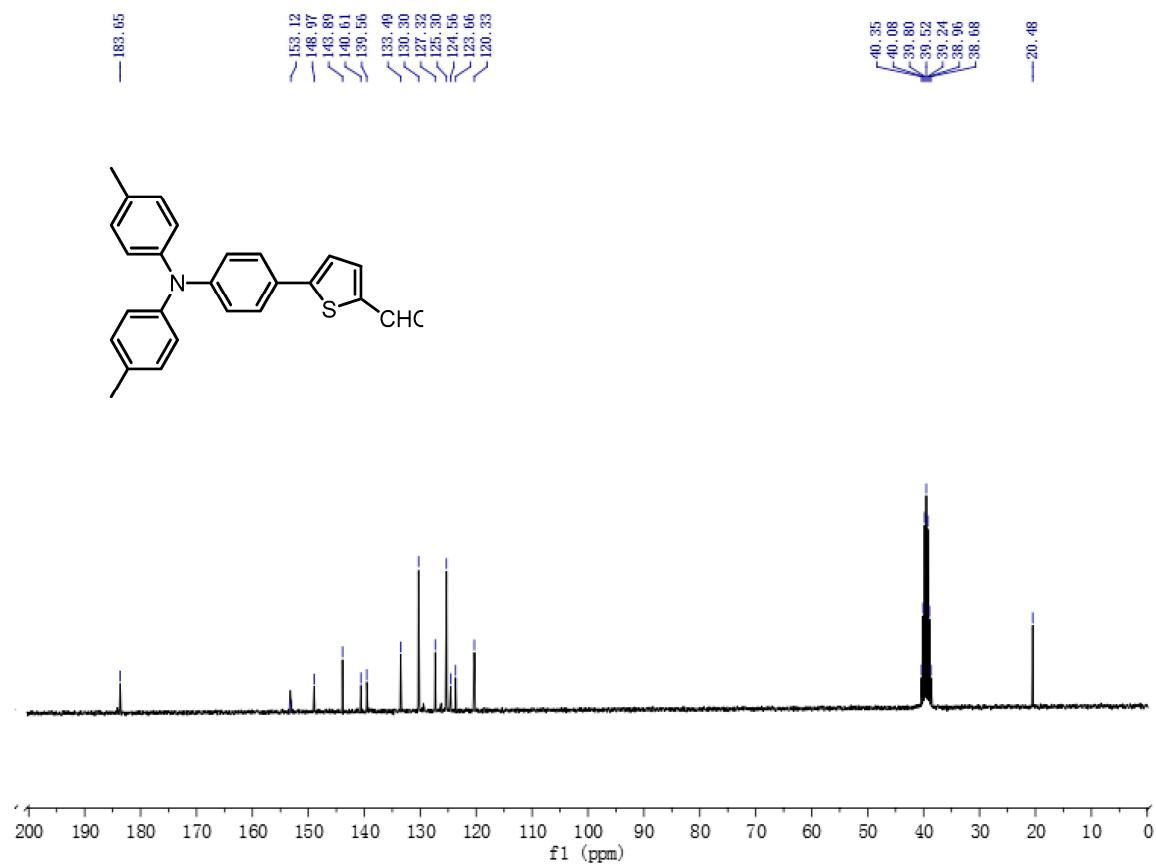

Figure S7. <sup>13</sup>C-NMR Spectrum of 4 in DMSO-d<sub>6</sub> (75 MHz).

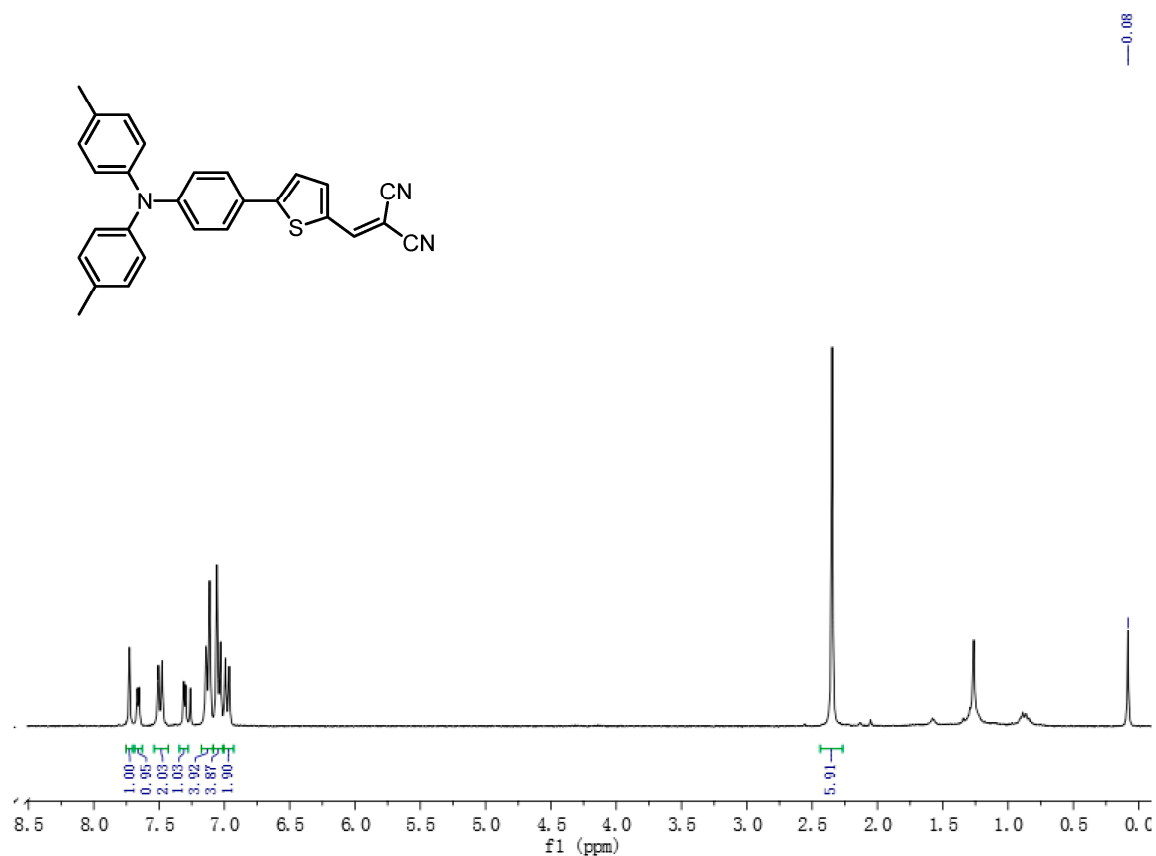

Figure S8. <sup>1</sup>H-NMR Spectrum of **1** in CDCl<sub>3</sub> (300 MHz).

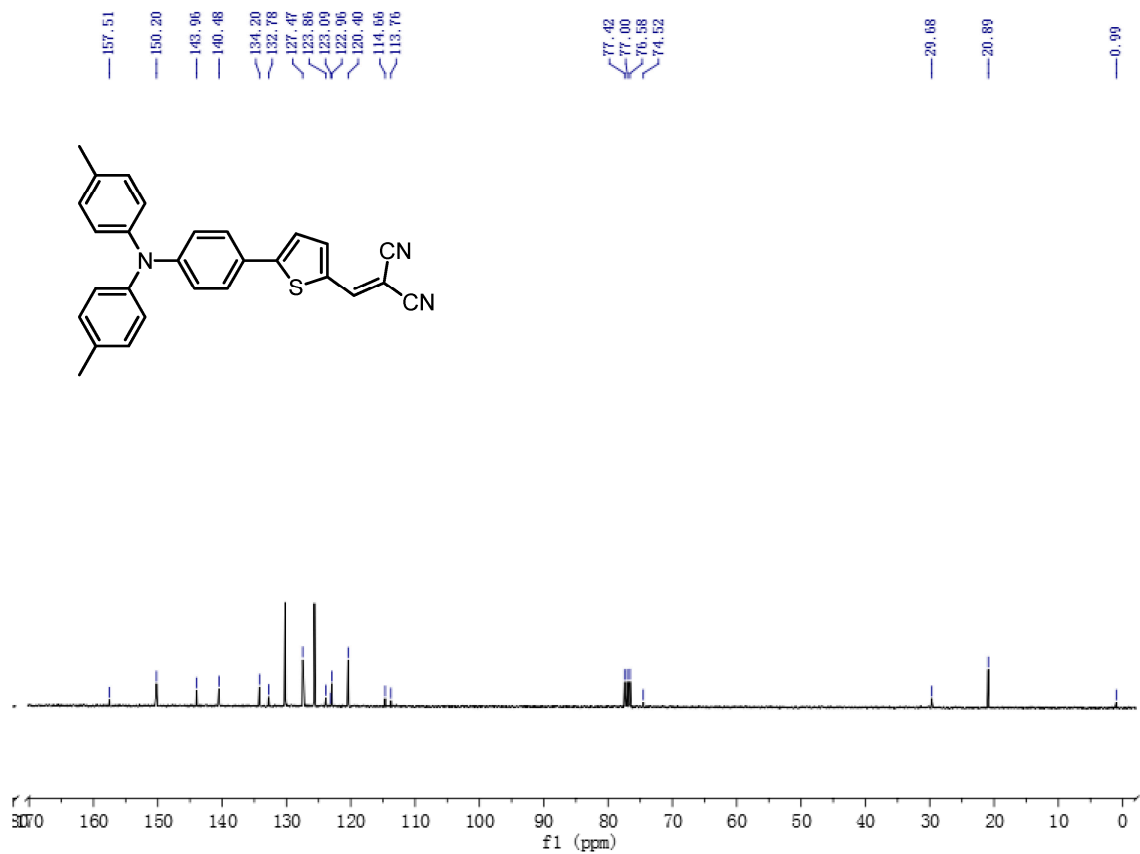

Figure S9. <sup>13</sup>C-NMR Spectrum of **1** in CDCl<sub>3</sub> (75 MHz).

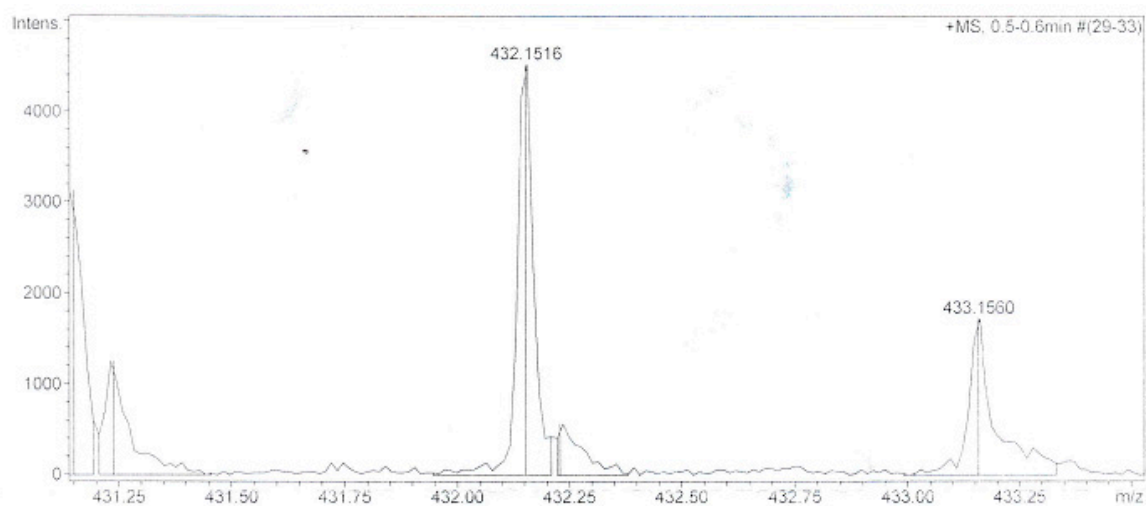

**Figure S10.** HRMS (ESI) Spectrum of **1**. calcd. for  $[M + H]^+$  432.1529, found 432.1516.

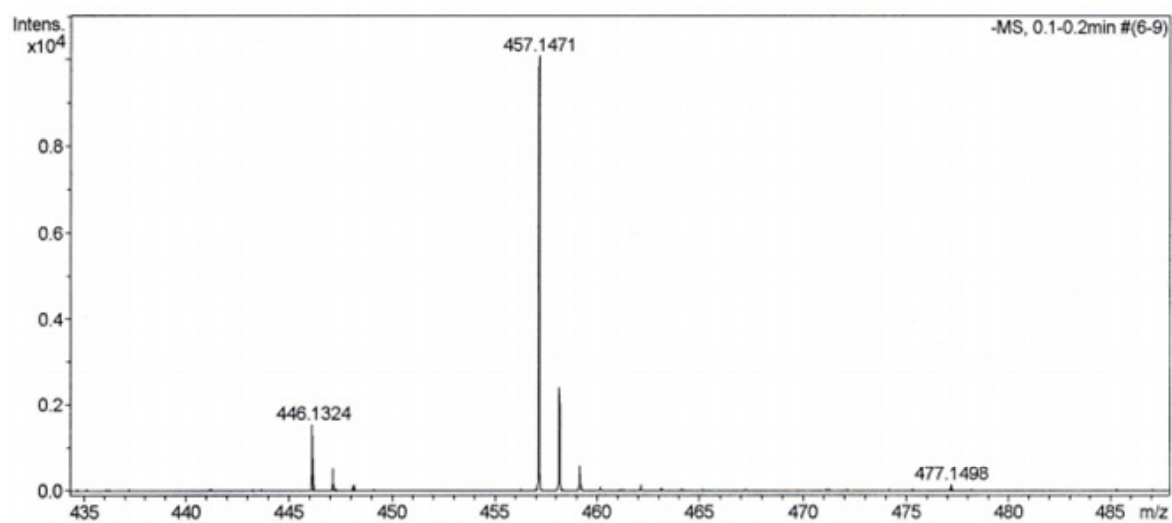

**Figure S11.** HRMS (ESI) Spectrum of  $[1 + CN]^-$  calcd. for  $[M]^-$  457.1492, found 457.1471.
